# Supplementary material for: Decoration of intramyocellular lipid droplets with PLIN5 modulates fasting-induced insulin resistance and lipotoxicity in humans
Source: PubMed Central journal article supplement (PMC4826431; doi:10.1007/s00125-016-3865-z), 2016-02-10
Supplement: 125_2016_3865_MOESM3_ESM.pdf [file 125_2016_3865_MOESM3_ESM.pdf]

**Supplemental Table 1:** Primer sequences

| Gene             | Forward                  | Reverse                | Probe                    |
|------------------|--------------------------|------------------------|--------------------------|
| PLIN5<br>(OXPAT) | GAGCCATGCTGTGGATGTTGTA   | CAGTGCCGCGAGCTCTTC     | TGGATCACTTCCTGCCCATGACGG |
| RPLP0            | CCATTCTATCATCAACGGGTACAA | AGCAAGTGGGAAGGTGTAATCC |                          |
